# Supplementary material for: Fresh Air for the Mire-Breathing Hypothesis: Sphagnum Moss and Peat Structure Regulate the Response of CO2 Exchange to Altered Hydrology in a Northern Peatland Ecosystem
Source: MDPI journal article supplement (doi:10.3390/w14203239), 2022-10-14
Supplement: s1 [file s1]

Archive with 1 entries (1 files):
- water-1862815-supplementary.pdf
